# Supplementary material for: Microbial communities respond to experimental warming, but site matters
Source: PubMed Central journal article supplement (PMC4006228; doi:10.7717/peerj.358), 2014-04-24
Supplement: peerj-02-358-s001.pdf [file peerj-02-358-s001.pdf]

419 **Appendix 1.** Microbial community structure and function differed significantly between the northern and southern sites. F and p  
420 statistics (in parentheses) show the main effects of site, soil temperature, and soil moisture and the interactive effects of site × soil  
421 temperature, site × soil moisture, soil temperature × soil moisture, and site × soil temperature × soil moisture on all variables  
422 measured. P values ≤ 0.05 are bold. The PERMANOVA community analysis used site as a factor and soil temperature and soil  
423 moisture as covariates thus there are no F and p values for the full model.

| Full model                      |                                  | Site                             | Soil temperature                  | Soil moisture  | Site × soil temperature | Site × soil moisture | Soil temperature × soil moisture | Site × soil temperature × soil moisture |
|---------------------------------|----------------------------------|----------------------------------|-----------------------------------|----------------|-------------------------|----------------------|----------------------------------|-----------------------------------------|
| Microbial community composition | na                               | <b>1.67</b><br><b>(0.03)</b>     | <b>17.86</b><br><b>(&lt;0.01)</b> | 0.87<br>(0.63) | 0.81<br>(0.71)          | 0.82<br>(0.69)       | 1.03<br>(0.42)                   | 0.82<br>(0.69)                          |
| Fungal community composition    | na                               | 0.85<br>(0.66)                   | <b>4.33</b><br><b>(&lt;0.01)</b>  | 0.92<br>(0.58) | 1.10<br>(0.35)          | 0.98<br>(0.49)       | 1.28<br>(0.18)                   | 0.88<br>(0.62)                          |
| Bacterial community composition | na                               | <b>3.43</b><br><b>(&lt;0.01)</b> | <b>41.89</b><br><b>(&lt;0.01)</b> | 0.85<br>(0.60) | 0.50<br>(0.90)          | 0.63<br>(0.80)       | 0.77<br>(0.67)                   | 0.76<br>(0.68)                          |
| Total richness                  | 1.38<br>(0.28)                   | <b>5.78</b><br><b>(0.03)</b>     | <b>6.83</b><br><b>(0.02)</b>      | 3.16<br>(0.09) | 0.42<br>(0.53)          | 0.01<br>(0.94)       | 0.01<br>(0.98)                   | <b>4.32</b><br><b>(0.05)</b>            |
| Fungal richness                 | 2.42<br>(0.07)                   | 3.61<br>(0.08)                   | <b>6.14</b><br><b>(0.02)</b>      | 3.16<br>(0.09) | 2.88<br>(0.11)          | 0.84<br>(0.37)       | 1.21<br>(0.29)                   | <b>4.31</b><br><b>(0.05)</b>            |
| Bacterial richness              | <b>3.95</b><br><b>(0.01)</b>     | 4.07<br>(0.06)                   | 1.67<br>(0.21)                    | 0.46<br>(0.51) | 4.10<br>(0.06)          | 3.25<br>(0.09)       | <b>5.37</b><br><b>(0.03)</b>     | 0.64<br>(0.43)                          |
| Fungal:bacterial                | <b>2.74</b><br><b>(0.05)</b>     | 0.05<br>(0.83)                   | 0.69<br>(0.42)                    | 2.10<br>(0.17) | 1.76<br>(0.20)          | 3.67<br>(0.07)       | <b>5.04</b><br><b>(0.04)</b>     | 1.82<br>(0.20)                          |
| Fungal abundance                | <b>4.73</b><br><b>(&lt;0.01)</b> | 2.68<br>(0.12)                   | 0.36<br>(0.55)                    | 0.16<br>(0.70) | 1.33<br>(0.26)          | 1.24<br>(0.28)       | 2.16<br>(0.16)                   | 0.19<br>(0.67)                          |

|                       |                                    |                                |                                |                                     |                                     |                                     |                                     |                                     |
|-----------------------|------------------------------------|--------------------------------|--------------------------------|-------------------------------------|-------------------------------------|-------------------------------------|-------------------------------------|-------------------------------------|
| Bacterial abundance   | <b>3.78</b><br>( <b>0.01</b> )     | <b>9.22</b><br>( <b>0.01</b> ) | <b>9.66</b><br>( <b>0.01</b> ) | <b>17.34</b><br>( <b>&lt;0.01</b> ) | 3.45<br>(0.08)                      | <b>10.24</b><br>( <b>0.01</b> )     | <b>11.75</b><br>( <b>&lt;0.01</b> ) | <b>18.17</b><br>( <b>&lt;0.01</b> ) |
| Xylosidase            | <b>3.47</b><br>( <b>0.02</b> )     | <b>4.39</b><br>( <b>0.05</b> ) | <b>4.52</b><br>( <b>0.05</b> ) | <b>9.03</b><br>( <b>0.01</b> )      | <b>13.50</b><br>( <b>&lt;0.01</b> ) | <b>13.92</b><br>( <b>&lt;0.01</b> ) | <b>13.94</b><br>( <b>&lt;0.01</b> ) | <b>10.22</b><br>( <b>0.01</b> )     |
| Sulfatase             | <b>2.84</b><br>( <b>0.04</b> )     | 3.62<br>(0.08)                 | 0.80<br>(0.39)                 | 2.33<br>(0.15)                      | 0.47<br>(0.50)                      | 0.002<br>(0.96)                     | 0.43<br>(0.52)                      | 0.82<br>(0.38)                      |
| Cellobiohydrolase     | 0.84<br>(0.57)                     | 0.87<br>(0.37)                 | 1.44<br>(0.25)                 | 0.50<br>(0.49)                      | 2.68<br>(0.12)                      | 0.60<br>(0.45)                      | 1.05<br>(0.32)                      | 1.05<br>(0.32)                      |
| $\beta$ -glucosidase  | <b>5.04</b><br>( <b>&lt;0.01</b> ) | 0.19<br>(0.67)                 | 0.71<br>(0.41)                 | 0.59<br>(0.46)                      | <b>5.10</b><br>( <b>0.04</b> )      | 3.29<br>(0.09)                      | 3.93<br>(0.06)                      | 1.33<br>(0.27)                      |
| $\alpha$ -glucosidase | 2.11<br>(0.10)                     | 4.11<br>(0.06)                 | 2.20<br>(0.16)                 | 2.17<br>(0.16)                      | 0.50<br>(0.49)                      | 2.48<br>(0.13)                      | 1.30<br>(0.27)                      | 1.99<br>(0.18)                      |
| Nagase                | <b>4.72</b><br>( <b>&lt;0.01</b> ) | <b>7.67</b><br>( <b>0.01</b> ) | 3.22<br>(0.09)                 | <b>5.55</b><br>( <b>0.03</b> )      | 0.69<br>(0.42)                      | 1.07<br>(0.32)                      | 0.51<br>(0.49)                      | <b>5.42</b><br>( <b>0.03</b> )      |
| Phosphatase           | 1.24<br>(0.34)                     | 0.70<br>(0.42)                 | 1.55<br>(0.23)                 | 0.03<br>(0.86)                      | 3.33<br>(0.09)                      | 4.02<br>(0.06)                      | 3.79<br>(0.07)                      | 0.15<br>(0.70)                      |
| Phenol oxidase        | <b>3.43</b><br>( <b>0.02</b> )     | 0.74<br>(0.40)                 | 1.95<br>(0.18)                 | 1.07<br>(0.32)                      | 1.27<br>(0.28)                      | 1.78<br>(0.20)                      | 0.89<br>(0.36)                      | 0.31<br>(0.59)                      |
| Peroxidase            | 2.23<br>(0.09)                     | 0.56<br>(0.46)                 | 1.45<br>(0.25)                 | 0.001<br>(0.98)                     | 1.45<br>(0.25)                      | 0.001<br>(0.98)                     | 0.001<br>(0.98)                     | 0.001<br>(0.98)                     |
| Decomposition rate    | <b>4.06</b><br>( <b>0.01</b> )     | 2.58<br>(0.13)                 | 0.26<br>(0.62)                 | 0.06<br>(0.81)                      | 0.03<br>(0.86)                      | 0.005<br>(0.95)                     | 0.001<br>(0.98)                     | 0.03<br>(0.86)                      |

---

424 **Appendix 2.** Warming altered microbial community structure and function at the southern site. Raw data values for all response  
 425 variables are listed below.

| Chamber temperature                                     | Southern site        |                      |                      |                      |                      |                      |                      |                      |                      |                      |
|---------------------------------------------------------|----------------------|----------------------|----------------------|----------------------|----------------------|----------------------|----------------------|----------------------|----------------------|----------------------|
|                                                         | 0                    | 1.5                  | 2.0                  | 2.5                  | 3.0                  | 3.5                  | 4.0                  | 4.5                  | 5.0                  | 5.5                  |
| Soil temperature (°C)                                   | 14.1                 | 14.6                 | 14.4                 | 14.9                 | 15.7                 | 14.4                 | 15.6                 | 15.4                 | 15.7                 | 16.1                 |
| Soil moisture (VWC)                                     | 0.29                 | 0.27                 | 0.26                 | 0.32                 | 0.19                 | 0.17                 | 0.26                 | 0.27                 | 0.23                 | 0.29                 |
| Total microbial richness (OTUs)                         | 92                   | 92                   | 98                   | 92                   | 155                  | 79                   | 98                   | 92                   | 83                   | 117                  |
| Fungal richness (OTUs)                                  | 36                   | 33                   | 43                   | 32                   | 106                  | 24                   | 40                   | 36                   | 28                   | 56                   |
| Bacterial richness (OTUs)                               | 56                   | 59                   | 55                   | 60                   | 49                   | 55                   | 58                   | 56                   | 55                   | 61                   |
| Fungal:bacterial                                        | 2.5                  | 3.2                  | 3.5                  | 6.3                  | 0.2                  | 5.8                  | 1.7                  | 9.0                  | 3.8                  | 1.9                  |
| Fungal abundance (copy number g <sup>-1</sup> soil)     | 1.89×10 <sup>8</sup> | 2.81×10 <sup>8</sup> | 1.95×10 <sup>8</sup> | 2.75×10 <sup>8</sup> | 9.92×10 <sup>7</sup> | 1.86×10 <sup>8</sup> | 2.25×10 <sup>8</sup> | 3.12×10 <sup>8</sup> | 1.80×10 <sup>8</sup> | 1.05×10 <sup>8</sup> |
| Bacterial abundance (copy number g <sup>-1</sup> soil)  | 1.90×10 <sup>8</sup> | 8.78×10 <sup>7</sup> | 5.52×10 <sup>7</sup> | 4.40×10 <sup>7</sup> | 5.53×10 <sup>8</sup> | 3.21×10 <sup>7</sup> | 1.31×10 <sup>8</sup> | 3.47×10 <sup>7</sup> | 4.72×10 <sup>7</sup> | 5.70×10 <sup>7</sup> |
| Xylosidase (nmol h <sup>-1</sup> g soil <sup>-1</sup> ) | 88.1                 | 189.3                | 133.8                | 66.6                 | 16.4                 | 204.2                | 75.8                 | 183.3                | 58.3                 | 112.6                |
| Sulfatase (nmol h <sup>-1</sup> g soil <sup>-1</sup> )  | 9.6                  | 9.2                  | 14.3                 | 9.2                  | 10.9                 | 11.0                 | 9.8                  | 3.6                  | 0                    | 16.6                 |

|                                                                   |       |        |        |       |        |        |        |        |        |        |
|-------------------------------------------------------------------|-------|--------|--------|-------|--------|--------|--------|--------|--------|--------|
| Cellobiohydrolase<br>(nmol h <sup>-1</sup> g soil <sup>-1</sup> ) | 52.9  | 124.8  | 202.9  | 24.0  | 5.4    | 47.5   | 21.2   | 194.0  | 24.2   | 32.0   |
| β-glucosidase<br>(nmol h <sup>-1</sup> g soil <sup>-1</sup> )     | 93.8  | 165.4  | 175.5  | 77.3  | 23.7   | 141.0  | 104.8  | 405.5  | 55.4   | 80.2   |
| α-glucosidase<br>(nmol h <sup>-1</sup> g soil <sup>-1</sup> )     | 11.0  | 34.0   | 24.3   | 5.2   | 5.2    | 4.5    | 14.4   | 24.2   | 3.2    | 6.7    |
| Nagase<br>(nmol h <sup>-1</sup> g soil <sup>-1</sup> )            | 141.5 | 134.4  | 97.3   | 125.7 | 291.3  | 200.8  | 315.3  | 140.9  | 53.1   | 75.2   |
| Phosphatase<br>(nmol h <sup>-1</sup> g soil <sup>-1</sup> )       | 671.4 | 1376.5 | 1871.7 | 806.4 | 1185.9 | 1372.1 | 1335.5 | 1665.2 | 544.8  | 900.7  |
| Phenol oxidase<br>(nmol h <sup>-1</sup> g soil <sup>-1</sup> )    | 877.8 | 1343.4 | 409.6  | 987.0 | 738.7  | 779.9  | 891.8  | 2548.2 | 1834.8 | 2535.6 |
| Peroxidase<br>(nmol h <sup>-1</sup> g soil <sup>-1</sup> )        | 0     | 0      | 0      | 0     | 0      | 0      | 0      | 0      | 0      | 0      |
| Decomposition<br>(k constant)                                     | 0.27  | 0.12   | 0.36   | 0.23  | 0.17   | 0.35   | 0.37   | 0.55   | 0.13   | 0.18   |

---

426 **Appendix 3.** Warming had minimal effect on microbial community structure and function at the northern site. Raw data values for all  
 427 response variables at the northern site are listed below.

| <b>Chamber</b>                                                    | <b>Northern site</b> |                      |                      |                      |                      |                      |                      |                      |                      |                      |
|-------------------------------------------------------------------|----------------------|----------------------|----------------------|----------------------|----------------------|----------------------|----------------------|----------------------|----------------------|----------------------|
| <b>temperature</b>                                                | 0                    | 1.5                  | 2.0                  | 2.5                  | 3.0                  | 3.5                  | 4.0                  | 4.5                  | 5.0                  | 5.5                  |
| Soil temperature<br>(°C)                                          | 9.5                  | 9.5                  | 10.2                 | 10.5                 | 11.1                 | 10.9                 | 10.3                 | 10.4                 | 11.6                 | 11.1                 |
| Soil moisture<br>(VWC)                                            | 0.18                 | 0.18                 | 0.14                 | 0.24                 | 0.24                 | 0.14                 | 0.18                 | 0.24                 | 0.17                 | 0.16                 |
| Total richness<br>(OTUs)                                          | 94                   | 91                   | 133                  | 121                  | 108                  | 105                  | 109                  | 73                   | 92                   | 77                   |
| Fungal richness<br>(OTUs)                                         | 23                   | 29                   | 53                   | 37                   | 35                   | 34                   | 45                   | 23                   | 17                   | 16                   |
| Bacterial richness<br>(OTUs)                                      | 70                   | 62                   | 80                   | 84                   | 73                   | 71                   | 64                   | 50                   | 75                   | 61                   |
| Fungal:bacterial                                                  | 8.4                  | 13.2                 | 22.3                 | 4.4                  | 5.6                  | 5.1                  | 5.2                  | 9.6                  | 14.0                 | 3.2                  |
| Fungal abundance<br>(copy number g <sup>-1</sup> soil)            | 6.25×10 <sup>8</sup> | 1.25×10 <sup>9</sup> | 1.57×10 <sup>9</sup> | 5.89×10 <sup>8</sup> | 7.71×10 <sup>8</sup> | 4.44×10 <sup>8</sup> | 3.65×10 <sup>8</sup> | 4.33×10 <sup>8</sup> | 1.02×10 <sup>9</sup> | 2.84×10 <sup>8</sup> |
| Bacterial abundance<br>(copy number g <sup>-1</sup> soil)         | 7.25×10 <sup>7</sup> | 9.47×10 <sup>7</sup> | 7.05×10 <sup>7</sup> | 1.35×10 <sup>8</sup> | 1.38×10 <sup>8</sup> | 8.72×10 <sup>7</sup> | 7.04×10 <sup>7</sup> | 4.50×10 <sup>7</sup> | 7.24×10 <sup>7</sup> | 8.95×10 <sup>7</sup> |
| Xylosidase<br>(nmol h <sup>-1</sup> g soil <sup>-1</sup> )        | 57.7                 | 41.5                 | 121.9                | 181.6                | 123.2                | 190.1                | 112.1                | 77.3                 | 44.5                 | 63.9                 |
| Sulfatase<br>(nmol h <sup>-1</sup> g soil <sup>-1</sup> )         | 1.1                  | 11.6                 | 6.2                  | 0                    | 0                    | 22.8                 | 0                    | 0.4                  | 0                    | 9.3                  |
| Cellobiohydrolase<br>(nmol h <sup>-1</sup> g soil <sup>-1</sup> ) | 44.1                 | 47.7                 | 129.5                | 96.9                 | 83.0                 | 77.9                 | 84.5                 | 20.1                 | 30.9                 | 24.1                 |

|                                                                       |       |        |       |        |        |        |        |        |        |        |
|-----------------------------------------------------------------------|-------|--------|-------|--------|--------|--------|--------|--------|--------|--------|
| $\beta$ -glucosidase<br>(nmol h <sup>-1</sup> g soil <sup>-1</sup> )  | 253.3 | 311.9  | 635.5 | 396.4  | 625.4  | 338.8  | 403.0  | 323.5  | 416.0  | 143.6  |
| $\alpha$ -glucosidase<br>(nmol h <sup>-1</sup> g soil <sup>-1</sup> ) | 3.2   | 22.2   | 2.1   | 4.9    | 0      | 29.4   | 3.7    | 0      | 1.8    | 2.4    |
| Nagase<br>(nmol h <sup>-1</sup> g soil <sup>-1</sup> )                | 396.2 | 1025.4 | 698.6 | 492.7  | 1646.0 | 151.7  | 633.7  | 422.5  | 775.4  | 155.1  |
| Phosphatase<br>(nmol h <sup>-1</sup> g soil <sup>-1</sup> )           | 842.1 | 291.3  | 889.3 | 527.6  | 1299.2 | 1196.0 | 966.7  | 1702.2 | 1542.3 | 352.4  |
| Phenol oxidase<br>(nmol h <sup>-1</sup> g soil <sup>-1</sup> )        | 195.9 | 0      | 0     | 2768.0 | 3098.9 | 0      | 1248.2 | 0      | 0      | 1073.1 |
| Peroxidase<br>(nmol h <sup>-1</sup> g soil <sup>-1</sup> )            | 620.4 | 0      | 0     | 0      | 0      | 0      | 0      | 0      | 0      | 0      |
| Decomposition<br>(k constant)                                         | 0.09  | 0.06   | 0.14  | 0.06   | 0.06   | 0.04   | 0.05   | 0.05   | 0.09   | 0.03   |

---
